# Supplementary material for: Zonulin-Dependent Intestinal Permeability in Children Diagnosed with Mental Disorders: A Systematic Review and Meta-Analysis
Source: Nutrients. 2020 Jul 3;12(7):1982. doi: 10.3390/nu12071982 (PMC7399941; doi:10.3390/nu12071982)
Supplement: Supplementary file 1 [file nutrients-12-01982-s001.pdf]

**Table S1.** Summary of population characteristics.

| References             | Eligibility criteria                                                                                                                                                                                                                                                                                                                                                                                                                                                                                                                                                                                                                                                                                                                                                                                                                                                                                                                                                                                                                                                  | Age, years | Male/female proportion | Prior treatment history                                                                                                                                                   |
|------------------------|-----------------------------------------------------------------------------------------------------------------------------------------------------------------------------------------------------------------------------------------------------------------------------------------------------------------------------------------------------------------------------------------------------------------------------------------------------------------------------------------------------------------------------------------------------------------------------------------------------------------------------------------------------------------------------------------------------------------------------------------------------------------------------------------------------------------------------------------------------------------------------------------------------------------------------------------------------------------------------------------------------------------------------------------------------------------------|------------|------------------------|---------------------------------------------------------------------------------------------------------------------------------------------------------------------------|
| Özyurt et al., 2018    | Patients: Recruited at the Child Psychiatry and Pediatrics outpatient clinic of Tepecik Research and Training Hospital in Turkey. Chronological age of 7-12 years diagnosed with ADHD according to DSM-5 criteria and providing verbal assent (for children) and written informed consent (for parents). Controls: Recruited at the pediatric well-child clinics of the study center. Chronological age of 7-12 years, no psychopathology (K-SADS-PL), no chronic diseases/allergies/immunological disorders requiring treatment, providing verbal assent (for children) and written informed consent (for parents) for participation.                                                                                                                                                                                                                                                                                                                                                                                                                                | 7-12       | 51/30                  | N/A                                                                                                                                                                       |
| Esnafoğlu et al., 2017 | Patients: From Ordu University Faculty of Medicine Education and Research Hospital in Turkey - Pediatrics and Adolescent Psychiatry outpatient clinics with ASD diagnosis according to DSM-5 criteria. Controls: were included from those applying to the pediatric and adolescent psychiatry and pediatric outpatient clinics for minor reasons at the same hospital.                                                                                                                                                                                                                                                                                                                                                                                                                                                                                                                                                                                                                                                                                                | 4-11       | 46/19                  | N/A                                                                                                                                                                       |
| Józefczuk et al., 2017 | Patients: with ASDs. ASDs based on diagnostic interviews, observations, and examinations performed by pediatricians, neurologists, and psychologists. Patients did not attach GCFD for at least six months. Controls: Sera from healthy controls.                                                                                                                                                                                                                                                                                                                                                                                                                                                                                                                                                                                                                                                                                                                                                                                                                     | 2.5-18     | N/A                    | N/A                                                                                                                                                                       |
| Rose et al., 2018      | Enrolment in the Childhood Autism Risk from Genetics and Environment (CHARGE) study (Hertz-Picciotto et al. 2006). Participants were recruited from 4 groups, 1) children with ASD and GI symptoms of irregular bowel movements, 2) children with ASD, and no GI symptoms 3) typically developing children with GI symptoms of irregular bowel movements 4) typically developing children without GI symptoms.                                                                                                                                                                                                                                                                                                                                                                                                                                                                                                                                                                                                                                                        | 3-12       | 63/24                  | N/A                                                                                                                                                                       |
| İşık et al., 2020      | Patients from the outpatient clinic for child and adolescent psychiatry at the Suleyman Demirel University Medical Faculty in Turkey.) All patients were screened for psychiatric disorders according to The Schedule for Affective Disorders and Schizophrenia for School-Aged Children, Present and Lifetime Version (K-SADS-PL. Exclusion criteria were implemented: the existence of psychiatric disorders such as mental retardation, ASD, schizophrenia, bipolar disorder, and major depression; major physical (such as diabetes mellitus), allergic, or neurological diseases; those with body mass index (BMI) percentile $\geq 95\%$ ; use of corticosteroids or a drug that affects the immunological system in the last 6 months; having an active infection within the past month; and clinical suspicion of PANDAS or PANS. Controls: Healthy subjects matched by age and gender who applied to the hospital for a routine check-up. The same exclusion criteria were performed for the control group that was not affected by a major mental disorder. | 10-18      | 26/22                  | Sixteen patients were undergoing treatment. Ten patients used selective serotonin reuptake inhibitors (SSRI), and six took an SSRI and antipsychotic combination therapy. |

ADHD: Attention deficit hyperactivity disorder K-SADS-PL: Kiddie Schedule for Affective Disorders and Schizophrenia. ASD: Autism spectrum disorder. DSM-5: Diagnostic and Statistical Manual of Mental Disorders, 5th edition. GCFD: gluten-/casein-free diet. GI: Gastro-intestinal. SSRI: Selective serotonin reuptake inhibitors. BMI: Body mass index.

**Table S2.** Participants characteristics.

| <b>References</b>      | <b>Age, years.</b> | <b>Gender</b>   | <b>Disease characteristics</b>                                                                                                                                                                        | <b>Diagnostic criteria</b>                                                                                                                                                                                                                                                                                                   |
|------------------------|--------------------|-----------------|-------------------------------------------------------------------------------------------------------------------------------------------------------------------------------------------------------|------------------------------------------------------------------------------------------------------------------------------------------------------------------------------------------------------------------------------------------------------------------------------------------------------------------------------|
| Özyurt et al., 2018    | 7-12               | Male and female | Developmentally inappropriate and impairing symptoms of inattention, hyperactivity, and impulsivity. Problems with social cues, misinterpretation of social situations, and inappropriate responding. | DSM-5, DuPaul ADHD scale, and the Social Responsiveness Scale (SRS).                                                                                                                                                                                                                                                         |
| Esnafoglu et al., 2017 | 4-11               | Male and female | High rate of gastro-intestinal (GI) symptoms like diarrhea, constipation, pickiness about food, bloating, and stomach pain.                                                                           | DSM-5                                                                                                                                                                                                                                                                                                                        |
| Józefczuk et al., 2017 | 2.5-18             | Male and female | Impaired social interaction, communication, and repetitive behavior were appearing before three years of age.                                                                                         | ASD diagnostic criteria based on diagnostic interviews, observations, and examinations performed by pediatricians, neurologists, and psychologists.                                                                                                                                                                          |
| Rose et al., 2018      | 3-12               | Male and female | Social impairment and presence of repetitive or stereotyped behaviors.                                                                                                                                | DSM-5, Autism Diagnostic Interview-Revised (ADI-R) and Autism Diagnostic Observation Schedule (ADOS). Participants in the typically developing group had to score within the typical range on Social Communication Questionnaire (SCQ), Mullen Scales of Early Learning (MSEL), and Vineland Adaptive Behavior Score (VABS). |
| İşık et al., 2020      | 10-18              | Male and female | Distinctive and recurrent obsessions and/or compulsions.                                                                                                                                              | DSM-5 criteria for OCD                                                                                                                                                                                                                                                                                                       |

**Table S3.** Summary of metabolic parameters.

| References                | Biomarkers                                                                                                                                                                                                                             |
|---------------------------|----------------------------------------------------------------------------------------------------------------------------------------------------------------------------------------------------------------------------------------|
| Özyurt et al.,<br>2018    | Serum zonulin levels.                                                                                                                                                                                                                  |
| Esnafoğlu et al.,<br>2017 | Serum zonulin levels.                                                                                                                                                                                                                  |
| Józefczuk et al.,<br>2017 | Celiac specific antibodies (against intestinal TG2, neural TG6, and DPG) and AGA, in both IgA and IgG classes, I-FABP, zonulin.                                                                                                        |
| Rose et al.,<br>2018      | Cytokine analyses (IL-1 $\alpha$ , IL-1 $\beta$ , IL-6, IL-12(p40 & p70)), (TNF) $\alpha$ , IFN $\gamma$ (TH1), IL-4, IL-13(TH2), IL-10, (TGF) $\beta$ 1, IL-5, IL-15, IL-17, haptoglobin plasma levels, total DNA from stool samples. |
| Işık et al.,<br>2020      | Serum zonulin and claudin-5 levels.                                                                                                                                                                                                    |

**Table S4.** Plasma haptoglobin levels

| Groups                 | Haptoglobin genotypes |          |               |          |               |          |               |
|------------------------|-----------------------|----------|---------------|----------|---------------|----------|---------------|
|                        | <i>n</i>              |          | Hp1-1         | Hp2-1    |               | Hp2-2    |               |
|                        |                       | <i>n</i> | Plasma levels | <i>n</i> | Plasma levels | <i>n</i> | Plasma levels |
| Total ASD ( <i>n</i> ) | 54                    | 5        | 9.3           | 29       | 53.7          | 20       | 37            |
| ASD GI ( <i>n</i> )    | 23                    | 2        | 8.7           | 12       | 52.2          | 9        | 39.1          |
| ASD NoGI ( <i>n</i> )  | 31                    | 3        | 9.7           | 17       | 54.8          | 11       | 35.5          |
| Total TD ( <i>n</i> )  | 43                    | 8        | 18.6          | 19       | 44.2          | 16       | 37.2          |
| TD GI ( <i>n</i> )     | 6                     | 2        | 33.3          | 3        | 50            | 1        | 16.7          |
| TD NoGI ( <i>n</i> )   | 37                    | 6        | 16.2          | 16       | 43.2          | 15       | 40.5          |

ASD: autism spectrum disorders, ASD - GI: with ASD and GI symptoms of irregular bowel habits, ASD - NoGI: with ASD but without current or previous GI symptoms, TD-GI: typically developing children with GI symptoms, TD-NoGI: typically developing children but without current or previous GI symptoms.
